# Supplementary material
Source: PubMed Central journal article supplement (PMC6646003)
Supplement: ao8b00475_si_001.pdf [file ao8b00475_si_001.pdf]

# Effective Theranostic Cyanine for Imaging of Amyloid Species in vivo and Cognitive Improvements in Mouse Model

Yinhui Li,<sup>1,4</sup> Chen Chen,<sup>1,2</sup> Di Xu,<sup>1,3</sup> Chung-Yan Poon,<sup>1</sup> See-Lok Ho,<sup>1</sup> Rui Zheng,<sup>2</sup> Qiong Liu,<sup>2</sup> Guoli Song,<sup>2\*</sup> Hung-Wing Li,<sup>1\*</sup> and Man Shing Wong<sup>1,3\*</sup>

<sup>1</sup>Department of Chemistry, Hong Kong Baptist University, Kowloon Tong, Hong Kong SAR (China).

<sup>2</sup>Shenzhen Key Laboratory of Marine Biotechnology and Ecology, College of Life Sciences, Shenzhen University, Shenzhen, (China)

<sup>3</sup>The Institute of Molecular Functional Materials, Hong Kong Baptist University, Kowloon Tong, Hong Kong SAR (China)

<sup>4</sup>Key Laboratory for Green Organic Synthesis and Application of Hunan Province, Key Laboratory of Environmentally Friendly Chemistry and Application of Ministry of Education, College of Chemistry, Xiangtan University, Xiangtan, 411105 (China)

‡ Yinhui Li, Chen Chen and Di Xu contributed equally to this work

Corresponding author E-mail: [mswong@hkbu.edu.hk](mailto:mswong@hkbu.edu.hk); [hwli@hkbu.edu.hk](mailto:hwli@hkbu.edu.hk); [lilys@szu.edu.cn](mailto:lilys@szu.edu.cn)

## Supporting Information

|                  |                                                                    |    |
|------------------|--------------------------------------------------------------------|----|
| <b>Scheme S1</b> | Synthesis of <b>SLM</b>                                            | S2 |
| <b>Table S1</b>  | Physical properties of <b>SLM</b>                                  | S3 |
| <b>Figure S1</b> | Fluorescence titration                                             | S3 |
| <b>Figure S2</b> | Oligomerization inhibition                                         | S4 |
| <b>Figure S3</b> | MTT assay of <b>SLM</b>                                            | S4 |
| <b>Figure S4</b> | Retention of <b>SLM</b> in brain                                   | S5 |
| <b>Figure S5</b> | Body weights of mice after treatment                               | S5 |
| <b>Figure S6</b> | Swimming speed of mice                                             | S6 |
| <b>Figure S7</b> | Expression level of p-GSK3 $\beta$ , GSK3 $\beta$ , APP and Bace 1 | S6 |
| <b>Figure S8</b> | Expression of autophagy related proteins                           | S7 |
| <b>Figure S9</b> | NMR spectra                                                        | S8 |
| <b>Reference</b> |                                                                    | S9 |

## Experimental Section

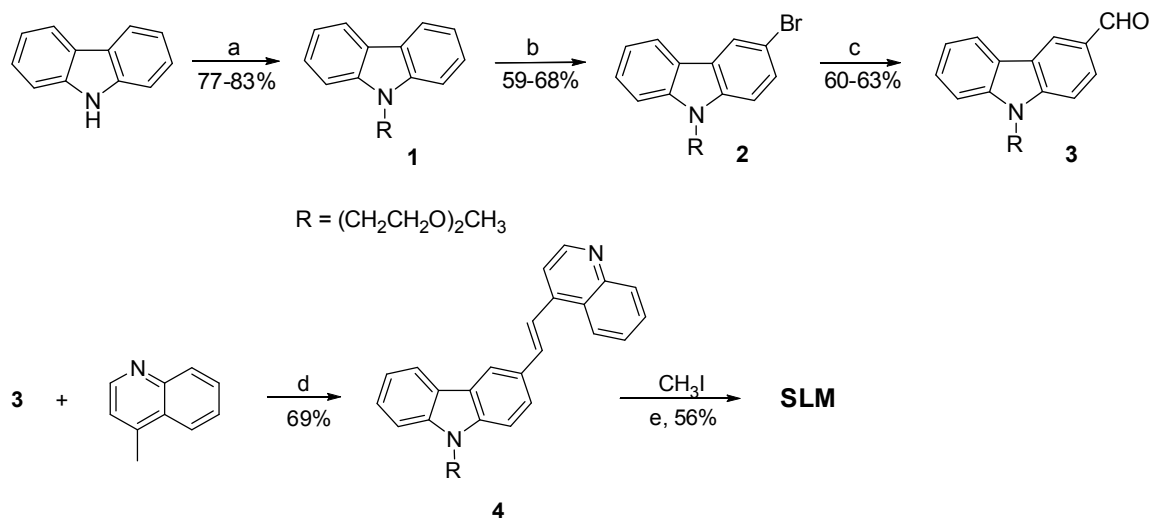

**Reagents and Conditions:** a,  $(\text{CH}_2\text{CH}_2\text{O})_2\text{CH}_3$ , NaH, DMF, 80 °C; b, NBS, DCM, 0 °C to r.t.; c, *n*-BuLi, DMF, THF, -78 °C to r.t.; d, TMSCl, DMF, 100 °C, sealed tube; e,  $\text{CH}_3\text{I}$ , r.t.

### Scheme S1. Synthesis of SLM.

**Synthetic Procedure of SLM.** Compound **1**, **2** and **3** were prepared by the literature protocols.<sup>1</sup> A solution mixture of **4** (0.6 mmol) and  $\text{CH}_3\text{I}$  (0.6 mmol) in ethanol (40 mL) was stirred at room temperature. After the reaction completed, the organic solvent was removed. The residue was purified by recrystallization from methanol to afford **SLM** as a red solid in 56% yield.  $^1\text{H}$  NMR (400 MHz,  $\text{DMSO-}d_6$ )  $\delta$  9.28 (d,  $J = 6.4$  Hz, 1H), 9.14 (d,  $J = 8.4$  Hz, 1H), 8.86 (s, 1H), 8.51 (d,  $J = 6.4$  Hz, 1H), 8.42 (m, 3H), 8.28 (m, 2H), 8.13 (d,  $J = 8.8$  Hz, 1H), 8.08 (t,  $J = 7.2$  Hz, 1H), 7.80 (d,  $J = 8.8$  Hz, 1H), 7.71 (d,  $J = 8.0$  Hz, 1H), 7.53 (t,  $J = 8.0$  Hz, 1H), 7.32 (t,  $J = 7.2$  Hz, 1H), 4.64 (t,  $J = 5.2$  Hz, 2H), 4.52 (s, 3H), 3.84 (t,  $J = 5.2$  Hz, 2H), 3.48 (m, 2H), 3.33 (m, 2H), 3.11 (s, 3H).  $^{13}\text{C}$  NMR (100 MHz,  $\text{DMSO-}d_6$ )  $\delta$  153.0, 147.0, 144.9, 142.1, 140.9, 138.8, 134.9, 129.0, 127.3, 126.7, 126.4, 126.1, 122.8, 122.2, 121.7, 120.4, 119.9, 119.3, 116.2, 115.1, 110.5, 110.4, 71.3, 69.8, 68.9, 58.1, 44.2, 42.9. HRMS (MALDI-TOF)  $m/z$  Calcd for  $\text{C}_{29}\text{H}_{29}\text{N}_2\text{O}_2$  437.2223 Found 437.2207 [ $\text{M}^+$ ].

**Table S1.** Physical properties of **SLM** and its dissociation constants ( $K_d$ ) with monomeric and fibrillar  $A\beta_{(1-40)}$  and  $A\beta_{(1-42)}$ .

| Dye        | $\lambda_{max}^{abs} / \lambda_{max}^{abs}$<br>(nm) | $K_d$ fibril( $A\beta_{40}$ )<br>$\mu M$ | $K_d$ mon( $A\beta_{40}$ )<br>$\mu M$ | $K_d$ fibril( $A\beta_{42}$ )<br>$\mu M$ | $K_d$ mon( $A\beta_{42}$ )<br>$\mu M$ | Log P |
|------------|-----------------------------------------------------|------------------------------------------|---------------------------------------|------------------------------------------|---------------------------------------|-------|
| <b>SLM</b> | 455/676                                             | 13.1                                     | 96.6                                  | 11.4                                     | 40.2                                  | 2.59  |

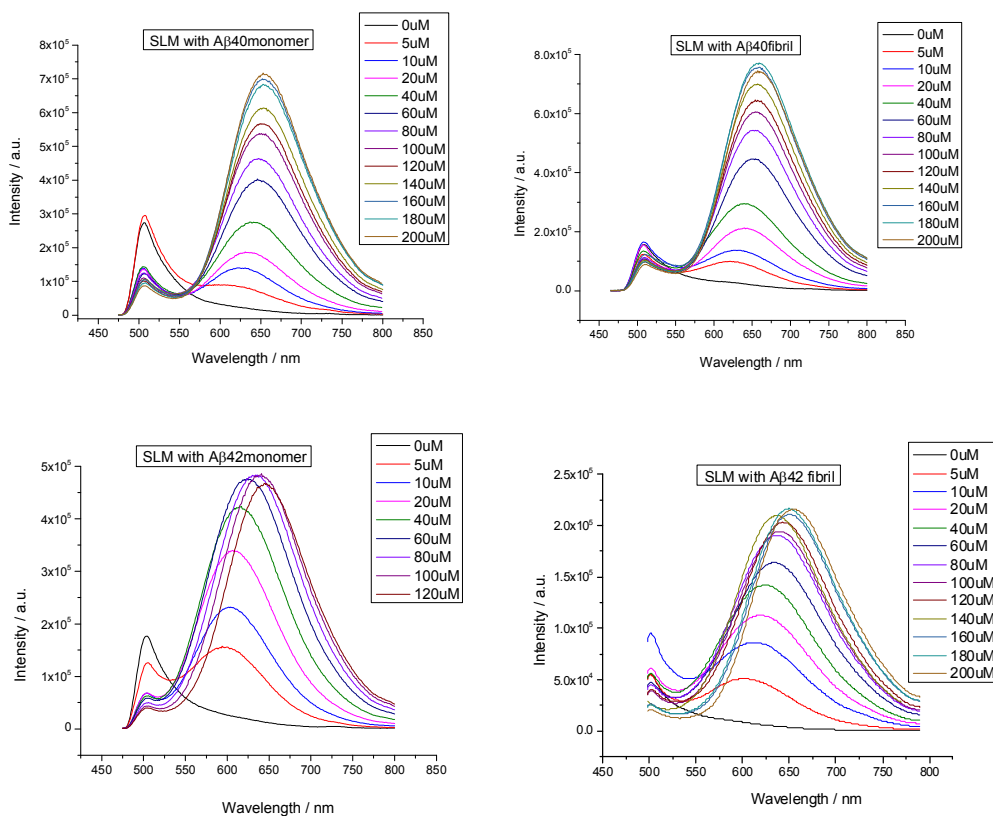

**Figure S1** Fluorescence titrations of **SLM** with  $A\beta_{(1-40)}$  monomer and fibrils as well as  $A\beta_{(1-42)}$  monomer and fibrils.

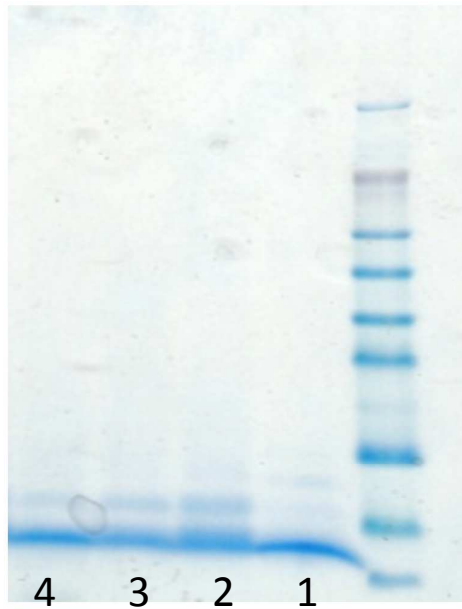

**Figure S2** The oligomerization of  $A\beta_{(1-42)}$  was inhibited by **SLM**, as revealed by SDS-PAGE. The outside lane represents the molecular weight markers; Lane 1, HFIP treated 100  $\mu$ M monomeric  $A\beta_{(1-42)}$ ; Lane 2, 100  $\mu$ M oligomeric  $A\beta_{(1-42)}$  by incubating monomer at 4°C for 24 h; (c) Lane 3-4, in the addition of **SLM**; at 1:1 and 5:1 molar ratio of cyanine-to-peptide, respectively. The intensity of the band of the dimeric was weaker when higher concentration of **SLM** was applied, suggesting the inhibitory effect on  $A\beta_{(1-42)}$  oligomerization.

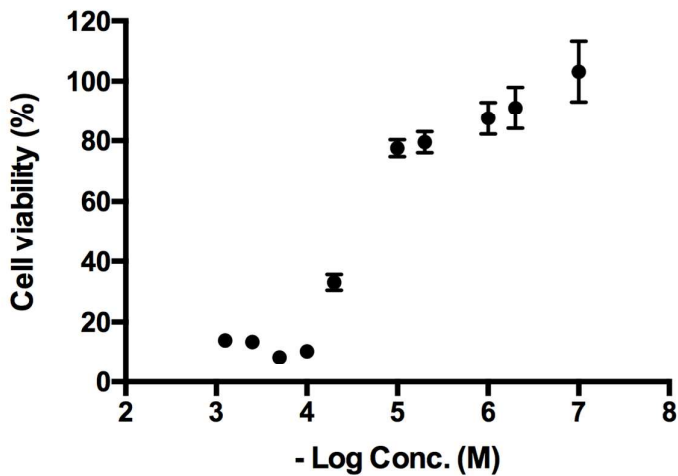

**Figure S3.** LC50 of SLM as assessed by the MTT assay.

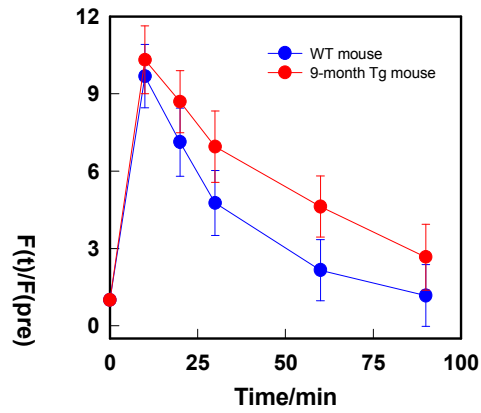

**Figure S4.** The relative fluorescence signal  $[F(t)/F(pre)]$  in the brain regions of Tg (9-month old) and WT mice after IV injection of SLM. The  $[F(t)/F(pre)]$  of Tg mouse was significantly higher than that of WT mouse ( $p < 0.05$ ).

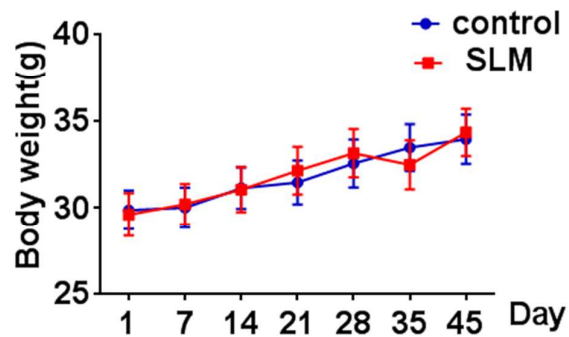

**Figure S5.** The body weights of the control and SLM treated mice after IP injection were monitored once a week.

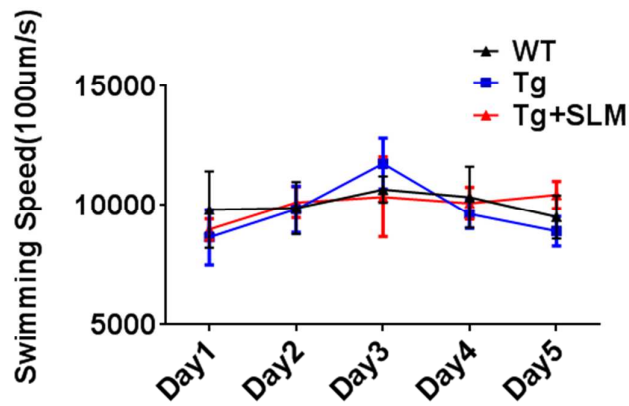

**Figure S6.** In the Morris Water Maze assessment, the swimming speed of the mice between the three groups was compared and it suggested that there was no significantly difference in the swimming ability.

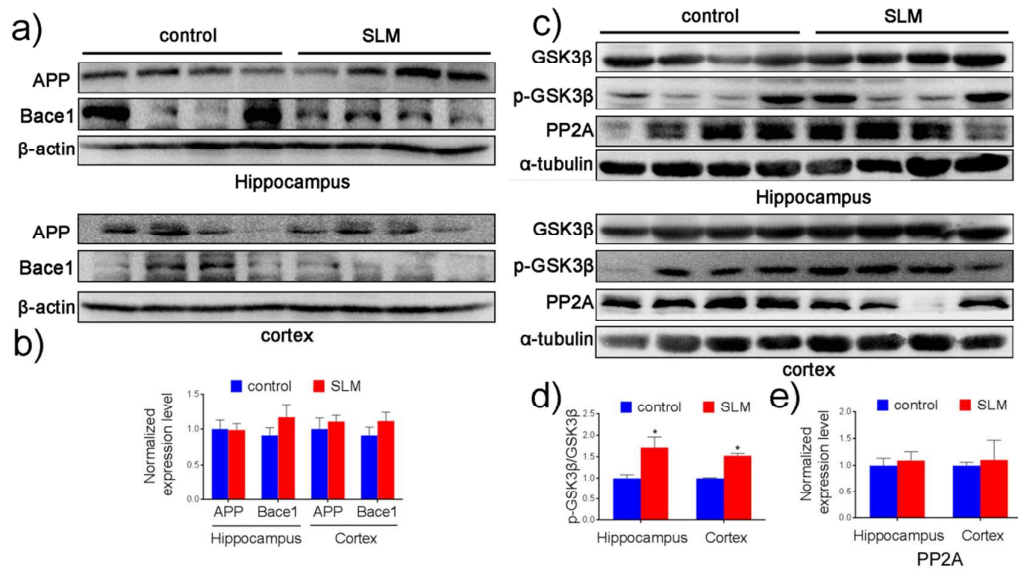

**Figure S7.** Upon SLM treatment, the level of inactive phosphorylated glycogen synthase kinase-3 $\beta$  (p-GSK3 $\beta$ ) (c-d) was significantly higher in the SLM-treated Tg mice. Nonetheless, the level of APP (a, b) and Bace 1 (a-b), PP2A (c, e) were similar as compared to the un-treated Tg mice indicating the production of A $\beta$  was not disrupted by the SLM treatment.

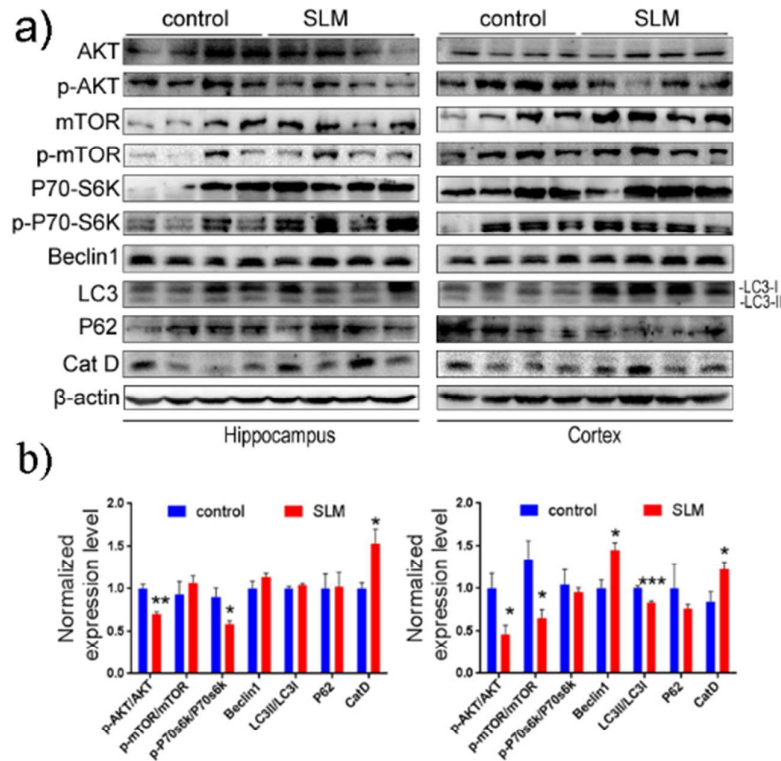

**Figure S8.** Upon **SLM** treatment, there was a significantly reduced level of mammalian target of rapamycin (mTOR)(a-b), a key gatekeeper of autophagy, which was down-regulated by the substantial decrease in an upstream effector, Akt(a-b); and an increase in the mammalian orthologue of yeast Atg6 (Beclin 1) level(a-b), a proautophagic protein. In addition, there was a markedly reduced level of microtubule-associated protein light chain 3-II (LC3-II) (a-b) and the LC3-associated protein p62 (sequestosome 1) (a-b), a marker of autophagic flux. The level of the lysosomal protease Cathepsin D (CatD) (a-b) that mediates the degradation in autophagolysosomes was found to be significantly increased.

a)

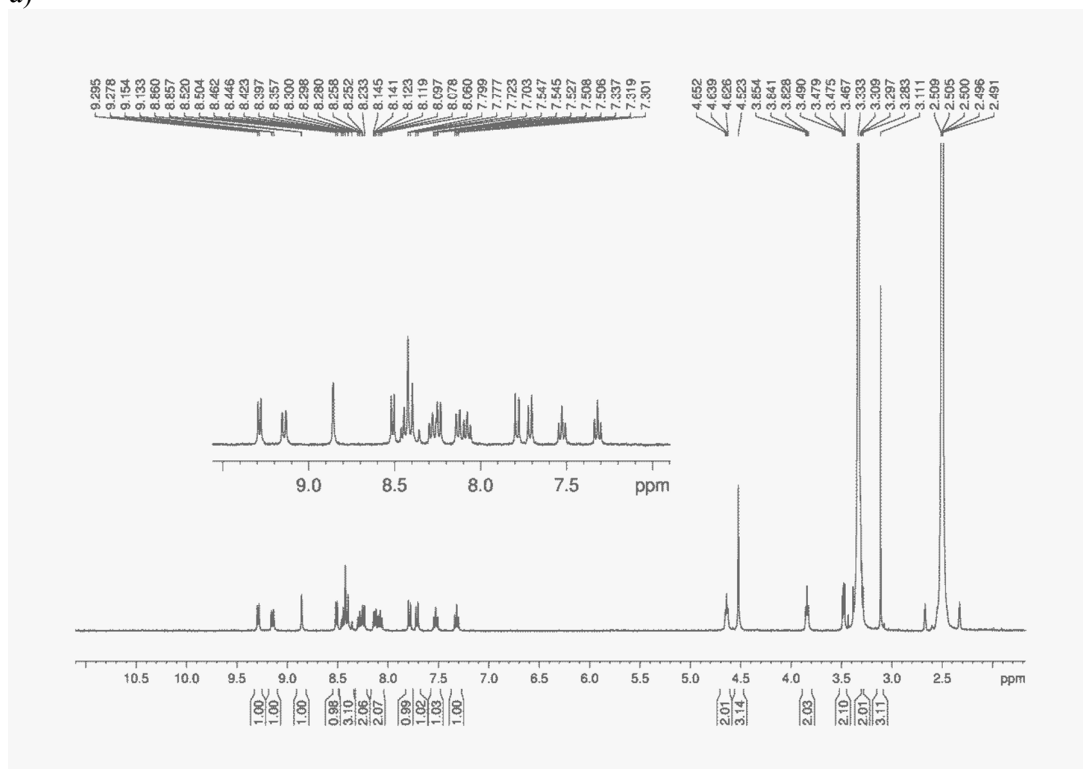

b)

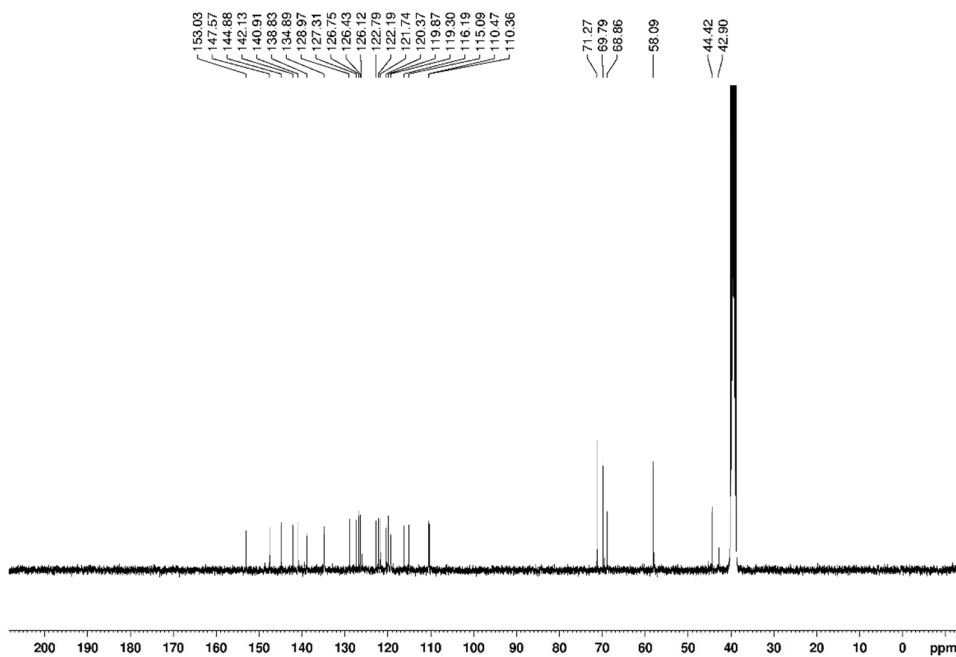

Figure S9. <sup>1</sup>H NMR (400 MHz, DMSO-*d*<sub>6</sub>) and <sup>13</sup>C NMR (100 MHz, DMSO-*d*<sub>6</sub>) spectra of SLM.



Reference:

1. Yang, W. G.; Wong, Y.; Ng, O. T. W.; Bai, L. P.; Kwong, D. W. J.; Ke, Y.; Jiang, Z. H.; Li, H. W.; Yung, K. K. L.; Wong, M. S. *Angew. Chem. Int. Ed.* **2012**, *51*, 1804.
